# Supplementary material for: Association of Maternal Antenatal Education with Quality of Life after Childbirth in the Slovenian Population before and during the COVID-19 Pandemic
Source: MDPI journal article supplement (doi:10.3390/healthcare11111568), 2023-05-26
Supplement: s1 [file s1]

Table S1: POST PARTUM QUALITY OF LIFE QUESTIONNAIRE

| Items  | Item content                                                                                           | 1 | 2 | 3 | 4 | 5 |
|--------|--------------------------------------------------------------------------------------------------------|---|---|---|---|---|
| PQOL1  | Do you worry that your child will fall sick?                                                           |   |   |   |   |   |
| PQOL2  | How satisfied are you with your child's health?                                                        |   |   |   |   |   |
| PQOL3  | Do you worry that your child will have an accident?                                                    |   |   |   |   |   |
| PQOL4  | How much do you take pains to prevent an accident to your child?                                       |   |   |   |   |   |
| PQOL5  | Do you worry about the nutrition of your child?                                                        |   |   |   |   |   |
| PQOL6  | Do you worry that your child is not smart?                                                             |   |   |   |   |   |
| PQOL7  | Do you think that your breast milk is enough for your child?                                           |   |   |   |   |   |
| PQOL8  | How satisfied are you with current feeding?                                                            |   |   |   |   |   |
| PQOL9  | Do you worry about unexpected pregnancy?                                                               |   |   |   |   |   |
| PQOL10 | How much are you bothered by contraception?                                                            |   |   |   |   |   |
| PQOL11 | How satisfied are you with your sleep?                                                                 |   |   |   |   |   |
| PQOL12 | Do you have enough time to rest?                                                                       |   |   |   |   |   |
| PQOL13 | How easily do you get tired?                                                                           |   |   |   |   |   |
| PQOL14 | How satisfied are you with the energy that you have?                                                   |   |   |   |   |   |
| PQOL15 | Does physical pain influence your daily life?                                                          |   |   |   |   |   |
| PQOL16 | How much do you think that your physical health has been affected by childbirth?                       |   |   |   |   |   |
| PQOL17 | How much conflict do you feel between child care and work?                                             |   |   |   |   |   |
| PQOL18 | Has your child caused you to be distracted and worried at work?                                        |   |   |   |   |   |
| PQOL19 | How satisfied are you with the way your body looks?                                                    |   |   |   |   |   |
| PQOL20 | Do you feel blue by your looks?                                                                        |   |   |   |   |   |
| PQOL21 | How much confidence do you have in caring for your baby well?                                          |   |   |   |   |   |
| PQOL22 | How much child care skill do you think you have?                                                       |   |   |   |   |   |
| PQOL23 | Are you interested in your child?                                                                      |   |   |   |   |   |
| PQOL24 | Are you willing to look after your child?                                                              |   |   |   |   |   |
| PQOL25 | Do you regret having had this child?                                                                   |   |   |   |   |   |
| PQOL26 | Is caring a baby hard for you?                                                                         |   |   |   |   |   |
| PQOL27 | Are you happy being a mother?                                                                          |   |   |   |   |   |
| PQOL28 | How much fun is your life after having this child?                                                     |   |   |   |   |   |
| PQOL29 | Do you have enough contact with the outside world?                                                     |   |   |   |   |   |
| PQOL30 | Do you see enough of your neighbors?                                                                   |   |   |   |   |   |
| PQOL31 | What do you think your husband's attitude is towards you?                                              |   |   |   |   |   |
| PQOL32 | How close is the relationship between you and your husband?                                            |   |   |   |   |   |
| PQOL33 | How much help do you get caring for your child?                                                        |   |   |   |   |   |
| PQOL34 | How much help do you get doing household chores?                                                       |   |   |   |   |   |
| PQOL35 | How clean is your house?                                                                               |   |   |   |   |   |
| PQOL36 | How satisfied are you with your housing situation                                                      |   |   |   |   |   |
| PQOL37 | Is the money that yourself can decide how to spend enough?                                             |   |   |   |   |   |
| PQOL38 | Do you worry about your finances?                                                                      |   |   |   |   |   |
| PQOL39 | How satisfied are you with your living environment, including pollution, noise, climate, and location? |   |   |   |   |   |
| PQOL40 | How satisfied are you with the transportation available to you?                                        |   |   |   |   |   |

Abbreviation: PQOL: Postpartum Quality of Life

For items 1, 3, 4, 5, 6, 9, 12, 15, 23, 24, 25, 26, 27, 38, the responses were; 1: Never, 2: Rarely, 3: Sometimes, 4: Often and 5: Always.

For items 2, 8, 11, 14, 19, 36, 39, 40, the responses were; 1: Very Unsatisfied, 2: Unsatisfied, 3: Neither satisfied nor unsatisfied, 4: Satisfied, 5: Verrysatisfied.

For items 7, 37, the responses were; 1: Is not enough at all, 2: Is not enough, 3: Sometimes, 4: Is enough, 5: Is always enough.

For items 10, 13, 16, 17, 18, 20, 21, 22, 28, 29, 30, 32, 33, 34, 35, the responses were; 1: Not at all, 2: Little, 3: Moderately, 4: Very, 5: Too much. And for item, 31 the responses were; 1: Very bad, 2: Bad, 3: Neither bad nor good, 4: Good, 5: Very good.
